# Supplementary material for: Nutritional Description of Organic and Conventional Food Products in Spain: The BADALI Project
Source: MDPI journal article supplement (doi:10.3390/nu15081876), 2023-04-13
Supplement: s1 [file s1]

**Table S1.** Description of the items included in the study, by food type and subtype.

| <b>Food Types and Subtypes</b>               | <b>Foods</b>                                                                                                  |
|----------------------------------------------|---------------------------------------------------------------------------------------------------------------|
| Biscuits                                     | All kinds of biscuits according to their commercial name, including waffers. Savoury biscuits were excluded.  |
| Biscuits – LNCS free                         | Biscuits with no low- and no-calorie sweeteners added                                                         |
| Breakfast cereals                            | Flakes, muesli, granola, extruded, ready-to-eat cereals                                                       |
| Breakfast cereals – "only cereals"           | Breakfast cereals elaborated only with cereals                                                                |
| Breakfast cereals – "more ingredients"       | Breakfast cereals elaborated with cereals and additional ingredients                                          |
| Cereal cakes/crackers                        | Cereal cakes and crackers with no yeast or gasifiers added                                                    |
| Cereal cakes/crackers – with cacao/chocolate | Cereal cakes/crackers with at least an ingredient adding cacao or chocolate                                   |
| Cereal cakes/crackers – cacao/chocolate free | Cereal cakes/crackers free of any ingredient adding cacao or chocolate                                        |
| Milk substitutes (plant-based drinks)        | Vegetable drinks made of soya, oat, rice, coco, nuts, tigernut, canary seed or any other vegetable ingredient |
| Toasted bread and similar                    | Toasted bread and similar products made with yeast                                                            |
| Yogurts/dairy desserts substitutes           | Fermented products and dairy desserts made of vegetable drinks                                                |

LNCS: low- and no-calorie sweeteners

**Table S2.** Items included in the study and distribution in conventional and organic in specific subtypes.

| <b>Food Types</b>                            | <b>Total (%)*</b> | <b>Conventional (%)</b> | <b>Organic (%)</b> |
|----------------------------------------------|-------------------|-------------------------|--------------------|
| Breakfast cereals – "only cereals"           | 97 (22.9)*        | 21 (10.1)               | 76 (35)            |
| Breakfast cereals – "more ingredients"       | 327 (77.1)*       | 186 (89.9)              | 141 (65)           |
| Cereal cakes/crackers – with cacao/chocolate | 48 (29.1)*        | 34 (41)                 | 14 (17.1)          |
| Cereal cakes/crackers – cacao/chocolate free | 117 (70.9)*       | 49 (59)                 | 68 (82.9)          |

%; percentage within the conventional/organic version; %\*: percentage of the total food subtype

**Table S3.** Energy and nutrient density of specific food subtypes. Values in 100 g or 100 mL.

| Food subtypes                                | Organic | Energy (kcal) |                |         | Protein (g) |                |          | Carbohydrates (g) |                 |          | Sugar (g) |                 |          |
|----------------------------------------------|---------|---------------|----------------|---------|-------------|----------------|----------|-------------------|-----------------|----------|-----------|-----------------|----------|
|                                              |         | n             | Median (IR)    | p-Value | n           | Median (IR)    | p-Value  | n                 | Median (IR)     | p-Value  | n         | Median (IR)     | p-Value  |
| Biscuits – LNCS free                         | No      | 419           | 475 (455; 500) | 0.452   | 419         | 6.3 (5.5; 7)   | < 0.001* | 419               | 66 (62; 70)     | < 0.001* | 416       | 26 (21; 34)     | < 0.001* |
|                                              | Yes     | 162           | 476 (455; 492) |         | 162         | 7 (6; 8.2)     |          | 162               | 63 (60; 67.8)   |          | 159       | 21 (18; 25)     |          |
| Breakfast cereals – "more ingredients"       | No      | 186           | 390 (377; 425) | 0.367   | 186         | 8.6 (7.2; 11)  | < 0.05*  | 186               | 68.8 (63; 78)   | < 0.05*  | 186       | 19.1 (13.2; 25) | < 0.01*  |
|                                              | Yes     | 138           | 388 (369; 431) |         | 141         | 9.3 (8.1; 11)  |          | 138               | 65 (60.6; 73.8) |          | 140       | 15 (9.8; 21.9)  |          |
| Cereal cakes/crackers – cacao/chocolate free | No      | 49            | 385 (379; 408) | < 0.05* | 49          | 7.9 (7; 9)     | < 0.05*  | 49                | 79 (72; 83)     | 0.823    | 48        | 1 (0.5; 3)      | 0.429    |
|                                              | Yes     | 66            | 381 (374; 388) |         | 68          | 8.5 (7.6; 9.7) |          | 66                | 78 (75; 81)     |          | 68        | 0.9 (0.5; 2.1)  |          |

  

| Food subtypes                                | Organic | Total fat (g) |                 |         | Saturated fat (g) |                |          | Fibre (g) |                |         | Sodium (mg) |                |          |
|----------------------------------------------|---------|---------------|-----------------|---------|-------------------|----------------|----------|-----------|----------------|---------|-------------|----------------|----------|
|                                              |         | n             | Median (IR)     | p-Value | n                 | Median (IR)    | p-Value  | n         | Median (IR)    | p-Value | n           | Median (IR)    | p-Value  |
| Biscuits – LNCS free                         | No      | 419           | 20 (16; 24)     | 0.357   | 418               | 7.7 (2.7; 13)  | < 0.001* | 318       | 3.5 (2.4; 5.5) | < 0.01* | 419         | 272 (198; 351) | < 0.001* |
|                                              | Yes     | 162           | 21 (16.8; 23)   |         | 162               | 4.3 (2.3; 10)  |          | 142       | 4.7 (2.9; 6)   |         | 162         | 178 (106; 272) |          |
| Breakfast cereals – "more ingredients"       | No      | 186           | 6.1 (3; 13.6)   | 0.654   | 186               | 1.7 (0.7; 3.3) | 0.49     | 168       | 6.4 (4.7; 9.1) | 0.285   | 185         | 200 (80; 308)  | < 0.001* |
|                                              | Yes     | 141           | 7.9 (2.6; 14.4) |         | 140               | 1.6 (0.7; 3.3) |          | 139       | 7.4 (4.8; 8.9) |         | 136         | 64 (12; 154)   |          |
| Cereal cakes/crackers – cacao/chocolate free | No      | 49            | 2.6 (2; 8.5)    | 0.052   | 49                | 0.6 (0.3; 1.4) | 0.462    | 42        | 2.7 (2; 4.2)   | 0.359   | 49          | 480 (352; 640) | < 0.001* |
|                                              | Yes     | 68            | 2.7 (1.9; 3.2)  |         | 68                | 0.5 (0.5; 0.6) |          | 59        | 3.2 (2.4; 4.5) |         | 68          | 220 (112; 400) |          |

IR: interquartile range. \* Statistically significant differences according to  $p < 0.05$ .

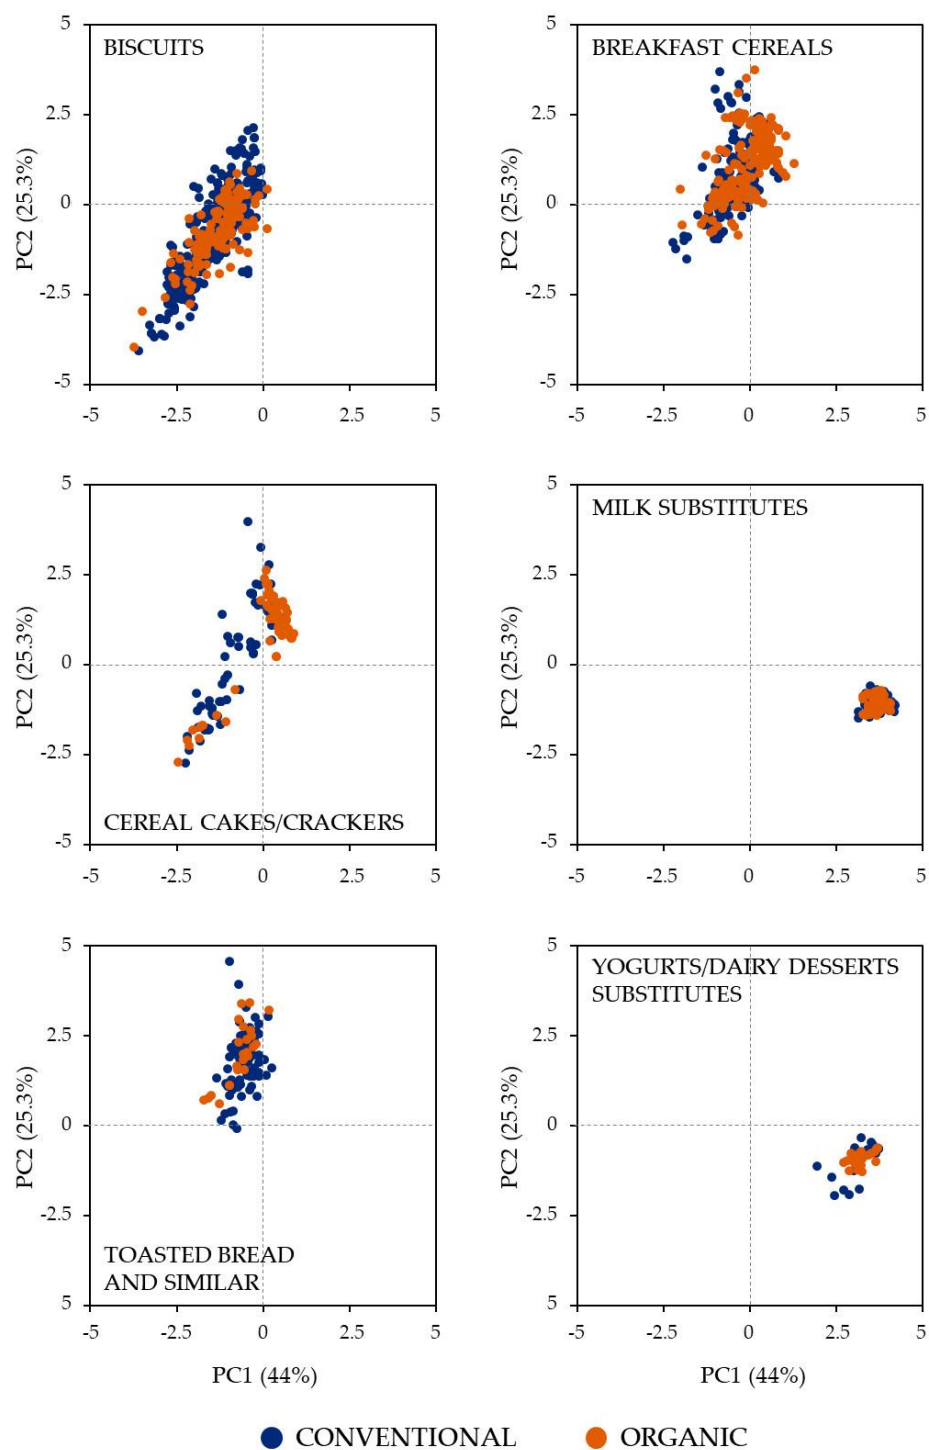

**Figure S1.** Principal Component Analysis (PCA) based on the nutritional composition of products included in this study, by food type, for conventional and organic food. Nutrients considered (in 100g or 100ml): energy (kcal), proteins (g), carbohydrates (g), sugar (g), total fat (g), saturated fat (g), fibre (g) and sodium (g).

**Table S4.** Classification of foods as high in critical nutrients according to the PAHO-NPM [41] of specific food subtypes.

| Food subtypes                                | Organic | Less healthy |            |          | High total fat |            |         | High free sugar |            |          | High saturated fat |            |          | High sodium |           |          | Sweeteners (LNCS) |         |         |
|----------------------------------------------|---------|--------------|------------|----------|----------------|------------|---------|-----------------|------------|----------|--------------------|------------|----------|-------------|-----------|----------|-------------------|---------|---------|
|                                              |         | n            | No (%)     | p-value  | n              | No (%)     | p-value | n               | No (%)     | p-value  | n                  | No (%)     | p-value  | n           | No (%)    | p-value  | n                 | No (%)  | p-value |
| Biscuits – LNCS free                         | No      | 415          | 415 (100)  | < 0.01*  | 419            | 337 (80.4) | 0.08    | 416             | 408 (98.1) | < 0.001* | 418                | 268 (64.1) | < 0.001* | 419         | 48 (11.5) | < 0.01*  | 419               | 0 (0)   | ND      |
|                                              | Yes     | 159          | 155 (97.5) |          | 162            | 141 (87)   |         | 159             | 137 (86.2) |          | 162                | 67 (41.4)  |          | 162         | 5 (3.1)   |          | 162               | 0 (0)   |         |
| Breakfast cereals – "more ingredients"       | No      | 185          | 169 (91.4) | < 0.01*  | 186            | 40 (21.5)  | 1       | 186             | 146 (78.5) | < 0.05*  | 186                | 22 (11.8)  | 0.481    | 185         | 24 (13)   | 0.937    | 185               | 8 (4.3) | < 0.05* |
|                                              | Yes     | 133          | 107 (80.5) |          | 138            | 29 (21)    |         | 137             | 89 (65)    |          | 137                | 12 (8.8)   |          | 133         | 16 (12)   |          | 141               | 0 (0)   |         |
| Cereal cakes/crackers – cacao/chocolate free | No      | 49           | 37 (75.5)  | < 0.001* | 49             | 4 (8.2)    | 0.065   | 49              | 0 (0)      | 0.611    | 49                 | 1 (2)      | 1        | 49          | 35 (71.4) | < 0.001* | 49                | 2 (4.1) | 0.338   |
|                                              | Yes     | 66           | 21 (31.8)  |          | 66             | 0 (0)      |         | 66              | 2 (3)      |          | 66                 | 1 (1.5)    |          | 66          | 18 (27.3) |          | 68                | 0 (0)   |         |

\* Statistically significant differences according to  $p < 0.05$ . "Less healthy": food exceeding any of the thresholds for critical nutrients or with sweeteners (LNCS). Thresholds used to consider foods as high in critical nutrients [41]:  $\geq 30\%$  of total energy from total fat,  $\geq 10\%$  of total energy from free sugars,  $\geq 10\%$  of total energy from saturated fat,  $\geq 1$  mg sodium/kcal. n=Foods with data. No=Foods exceeding the threshold or with LNCS. LNCS=low- and no-calorie sweeteners. ND: not determined because the condition for this food subtype was the absence of LNCS.

**Table S5.** Foods with nutrition claims (NCs), by food type.

| Food Types                         | No Foods with NCs (%) |             | <i>p</i> -value |
|------------------------------------|-----------------------|-------------|-----------------|
|                                    | Conventional (%)      | Organic (%) |                 |
| Biscuits                           | 180 (37.9)            | 59 (36.2)   | 0.77            |
| Breakfast cereals                  | 118 (57.6)            | 92 (42.6)   | < 0.01*         |
| Cereal cakes/crackers              | 26 (31.3)             | 54 (65.9)   | < 0.001*        |
| Milk substitutes                   | 94 (84.7)             | 155 (76)    | 0.095           |
| Toasted bread and similar          | 44 (30.6)             | 29 (54.7)   | < 0.01*         |
| Yogurts/dairy desserts substitutes | 15 (25)               | 49 (58.3)   | < 0.001*        |
| <b>Total</b>                       | 477 (44.2)            | 438 (54.6)  | < 0.001*        |

%; percentage within the food type. \* Statistically significant differences according to  $p < 0.05$ . Data in this table is plotted in Figure 1A.

**Table S6.** Nutrition claims (NCs), by nutrient.

| Nutrient     | Total | No Foods with NCs (%) |             | <i>p</i> -value |
|--------------|-------|-----------------------|-------------|-----------------|
|              |       | Conventional (%)      | Organic (%) |                 |
| Fat          | 109   | 39 (4.1)              | 70 (11.6)   | < 0.001*        |
| Fibre        | 355   | 234 (24.8)            | 121 (20)    | < 0.05*         |
| Light        | 21    | 6 (0.6)               | 15 (2.5)    | < 0.01*         |
| Minerals     | 149   | 99 (10.5)             | 50 (8.3)    | 0.147           |
| Other        | 50    | 28 (3)                | 22 (3.6)    | 0.468           |
| Protein      | 91    | 42 (4.4)              | 49 (8.1)    | < 0.01*         |
| Sodium/salt  | 51    | 21 (2.2)              | 30 (5)      | < 0.01*         |
| Sugar        | 441   | 197 (20.8)            | 244 (40.3)  | < 0.001*        |
| Vitamins     | 284   | 279 (29.5)            | 5 (0.8)     | < 0.001*        |
| <b>Total</b> | 1551  | 945                   | 606         | ND              |

%; percentage of total NCs in conventional or organic food. \* Statistically significant differences according to  $p < 0.05$ . Data in this table is plotted in Figure 1B. ND: not determined.
